# Supplementary material for: From Bite to Recovery: Safety and Efficacy of Pan-African Polyvalent Antivenom Used for Treating Snakebites in Cameroon
Source: MDPI journal article supplement (doi:10.3390/toxins18020059), 2026-01-23
Supplement: s1 [file toxins-4065699-supplementary.pdf › toxins-4065699-supplementary.pdf]

**Table S1:** Demographic, clinical, and snakebite characteristics across four health districts in Northern Cameroon (n=130).

|                                     | <b>RH Garoua<br/>(n=27)</b> | <b>HD Ghasiga<br/>(n=10)</b> | <b>HD Mayo oulo<br/>(n=49)</b> | <b>HD Poli<br/>(n=44)</b> | <b>Total</b>           |
|-------------------------------------|-----------------------------|------------------------------|--------------------------------|---------------------------|------------------------|
|                                     | <i>Mean<br/>(S.D.)</i>      | <i>Mean<br/>(S.D.)</i>       | <i>Mean<br/>(S.D.)</i>         | <i>Mean<br/>(S.D.)</i>    | <i>Mean<br/>(S.D.)</i> |
| <b>Age</b>                          | 26.11<br>(13.27)            | 31.00<br>(17.59)             | 25.29<br>(17.87)               | 28.52<br>(16.00)          | 26.99<br>(16.26)       |
| <b>Sex</b>                          |                             |                              |                                |                           |                        |
|                                     | <b>No. (%)</b>              | <b>No. (%)</b>               | <b>No. (%)</b>                 | <b>No. (%)</b>            | <b>No. (%)</b>         |
| Male                                | 16 (59.3%)                  | 7<br>(70.0%)                 | 23<br>(46.9%)                  | 23<br>(52.3%)             | 69<br>(53.1%)          |
| Female                              | 11 (40.7%)                  | 3<br>(30.0%)                 | 26<br>(53.1%)                  | 21<br>(47.7%)             | 61<br>(46.9%)          |
| <b>Total</b>                        | 27 (100.0%)                 | 10<br>(100.0%)               | 49<br>(100.0%)                 | 44<br>(100.0%)            | 130<br>(100.0%)        |
| <b>Chi-square: 2.317; p: 0.509</b>  |                             |                              |                                |                           |                        |
| <b>Types of snakes</b>              |                             |                              |                                |                           |                        |
| <i>Bitis</i> species                | 1<br>(3.7%)                 | 1<br>(10.0%)                 | 0<br>(-)                       | 1<br>(2.3%)               | 3<br>(2.3%)            |
| <i>Echis</i> species                | 17 (63.0%)                  | 6<br>(60.0%)                 | 35<br>(71.4%)                  | 40<br>(90.9%)             | 98<br>(75.4%)          |
| <i>Naja</i> species                 | 1<br>(3.7%)                 | 0<br>(0.0%)                  | 2<br>(4.1%)                    | 1<br>(2.3%)               | 4<br>(3.1%)            |
| Unidentified                        | 8<br>(29.6%)                | 3<br>(30.0%)                 | 12<br>(24.5%)                  | 2<br>(4.5%)               | 25<br>(19.2%)          |
| <b>Total</b>                        | 27<br>(100.0%)              | 10<br>(100.0%)               | 49<br>(100.0%)                 | 44<br>(100.0%)            | 130<br>(100.0%)        |
| <b>Chi-square: 14.654; p: 0.101</b> |                             |                              |                                |                           |                        |
| <b>Type of envenomation</b>         |                             |                              |                                |                           |                        |
| Hemotoxic                           | 16 (59.3%)                  | 2<br>(20.0%)                 | 35<br>(71.4%)                  | 36<br>(81.8%)             | 89<br>(68.5%)          |
| Local/cytotoxic                     | 11 (40.7%)                  | 8<br>(80.0%)                 | 14<br>(28.6%)                  | 7<br>(15.9%)              | 40<br>(30.8%)          |
| Neurotoxic                          | 0 (-)                       | 0 (-)                        | 0 (-)                          | 1<br>(2.3%)               | 1<br>(0.8%)            |

|                                     |                |                |                |                |                 |
|-------------------------------------|----------------|----------------|----------------|----------------|-----------------|
| <b>Total</b>                        | 27<br>(100.0%) | 10<br>(100.0%) | 49<br>(100.0%) | 44<br>(100.0%) | 130<br>(100.0%) |
| <b>Chi-square: 18.913; p: 0.004</b> |                |                |                |                |                 |
| <b>Tourniquet usage</b>             |                |                |                |                |                 |
| Yes                                 | 22 (81.5%)     | 6 (60.0%)      | 43 (87.8%)     | 18 (40.9%)     | 89 (68.5%)      |
| No                                  | 5 (18.5%)      | 4 (40.0%)      | 6 (12.2%)      | 26 (59.1%)     | 41 (31.5%)      |
| <b>Total</b>                        | 27 (100.0%)    | 10 (100.0%)    | 49 (100.0%)    | 44 (100.0%)    | 130 (100.0%)    |
| <b>Chi-square: 8.327; p: 0.215</b>  |                |                |                |                |                 |
| <b>Immobilization status</b>        |                |                |                |                |                 |
| Yes                                 | 3 (11.1%)      | 6 (60.0%)      | 15 (30.6%)     | 10 (22.7%)     | 34 (26.2%)      |
| No                                  | 24 (88.9%)     | 4 (40.0%)      | 34 (69.4%)     | 34 (77.3%)     | 96 (73.8%)      |
| <b>Total</b>                        | 27 (100.0%)    | 10 (100.0%)    | 49 (100.0%)    | 44 (100.0%)    | 130 (100.0%)    |
| <b>Use of native treatment</b>      |                |                |                |                |                 |
| Yes                                 | 24 (88.9%)     | 6 (60.0%)      | 38 (77.6%)     | 34 (77.3%)     | 102 (78.5%)     |
| No                                  | 3 (11.1%)      | 4 (40.0%)      | 11 (22.4%)     | 10 (22.7%)     | 28 (21.5%)      |
| <b>Total</b>                        | 27 (100.0%)    | 10 (100.0%)    | 49 (100.0%)    | 44 (100.0%)    | 130 (100.0%)    |
| <b>Chi-square: 3.815; p: 0.282</b>  |                |                |                |                |                 |

**Table S2:** Gradation of envenomation according to the African Society of Venimology.

| Stages | Edema                                                     | Hemorrhagic signs                             | Neurological signs                                       |
|--------|-----------------------------------------------------------|-----------------------------------------------|----------------------------------------------------------|
| 1      | Localized edema reaching the nearest joint                | Local bleeding persists for more than an hour | Anesthesia, local tingling, and pins and needles         |
| 2      | Progressive edema affecting no more than two joints       | Bleeding from the mouth, nose and scars       | Profuse sweating and salivation, vomiting, miosis        |
| 3      | Extensive edema not extending beyond the root of the limb | Ecchymosis, hematomas, purpura, phlyctenes    | Eyelid drooping, abnormal vision, hearing and swallowing |
| 4      | Edema extending beyond the root of the limb (anasarca)    | Internal hemorrhages (peritoneal, meningeal)  | Respiratory distress and inability to communicate        |

**Table S3:** Summary sheet of **commonly found** snakes in the following habitats: Sudanese savannas, Sahelian savannas, and Mandara mountains.

| Sr. No | French Name                         | English Translation           | Scientific Name                                     | Venomous/Non-venomous |
|--------|-------------------------------------|-------------------------------|-----------------------------------------------------|-----------------------|
| 1      | Rhinotyphlops décoré                | Decorated Rhinotyphlops       | <i>Afrotyphlops decoratus</i>                       | Non-venomous          |
| 2      | Rhinotyphlops ponctué ligné         | Striped Spotted Rhinotyphlops | <i>Afrotyphlops lineolatus</i>                      | Non-venomous          |
| 3      | Serpent-ver d'Adler                 | Adler's Worm Snake            | <i>Myriopholis adleri</i>                           | Non-venomous          |
| 4      | Boa des sables de Müller            | Müller's Sand Boa             | <i>Eryx muelleri</i>                                | Non-venomous          |
| 5      | Mamba noir                          | Black Mamba                   | <i>Dendroaspis polylepis</i>                        | Venomous              |
| 6      | Cobra égyptien                      | Egyptian Cobra                | <i>Naja haje</i>                                    | Venomous              |
| 7      | Cobra cracheur de Kati              | Kati Spitting Cobra           | <i>Naja katiensis</i> (syn. <i>N. nigricollis</i> ) | Venomous              |
| 8      | Cobra cracheur à cou noir           | Black-necked Spitting Cobra   | <i>Naja nigricollis</i>                             | Venomous              |
| 9      | Vipère heurtante                    | Puff Adder                    | <i>Bitis arietans</i>                               | Venomous              |
| 10     | Vipère du Gabon                     | Gaboon Viper                  | <i>Bitis gabonica</i>                               | Venomous              |
| 11     | Causus maculé                       | Spotted Night Adder           | <i>Causus maculatus</i>                             | Venomous              |
| 12     | Vipère à cornes de nez              | Nose-horned Viper             | <i>Vipera ammodytes</i>                             | Venomous              |
| 13     | Vipère rhinoceros                   | Rhinoceros Viper              | <i>Bitis nasicornis</i>                             | Venomous              |
| 14     | Tapis ventre blanc Viper            | White-bellied Carpet Viper    | <i>Echis leucogaster</i>                            | Venomous              |
| 15     | Vipère à tapis d'Afrique de l'Ouest | West African Carpet Viper     | <i>Echis ocellatus</i>                              | Venomous              |
| 16     | Vipère à écailles de scie           | Saw-scaled Viper              | <i>Echis pyramidum/ E. carinatus</i>                | Venomous              |
| 17     | Cobra des forêts                    | Forest Cobra                  | <i>Naja melanoleuca</i>                             | Venomous              |
| 18     | Mamba vert occidental               | Western Green Mamba           | <i>Dendroaspis viridis</i>                          | Venomous              |
| 19     | Mamba de Jameson                    | Jameson's Mamba               | <i>Dendroaspis jamesoni</i>                         | Venomous              |
| 20     | Mamba vert de l'Est                 | Eastern Green Mamba           | <i>Dendroaspis angusticeps</i>                      | Venomous              |

**Table S4:** Number of vials used for various patients.

| No. of vials | No. of patients |
|--------------|-----------------|
| 1            | 17              |
| 2            | 43              |
| 3            | 8               |
| 4            | 37              |
| 5            | 7               |
| 6            | 9               |
| 7            | 2               |
| 8            | 7               |
| Total        | 130             |

**Figure S1:** Summary sheet of images of **commonly found** snakes in the following habitats: Sudanese savannas, Sahelian savannas, and Mandara mountains.

| Non-venomous snakes                                                                 |                                                                                      |
|-------------------------------------------------------------------------------------|--------------------------------------------------------------------------------------|
|    |    |
| 1. Rhinotyphlops décoré                                                             | 2. Rhinotyphlops ponctué ligné                                                       |
|   |   |
| 3. Serpent-ver d'Adler                                                              | 4. Boa des sables de Müller                                                          |
| Venomous snakes                                                                     |                                                                                      |
|  |  |
| 5. Mamba noir                                                                       | 6. Cobra égyptien                                                                    |



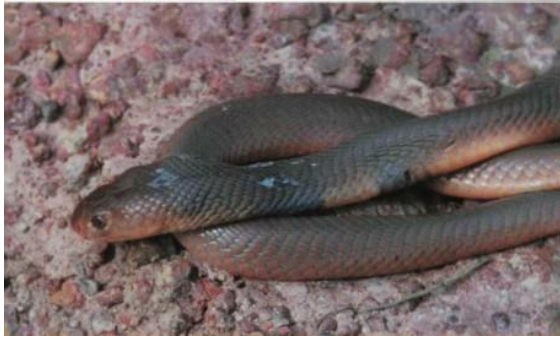

**7. Cobra cracheur de Kati**

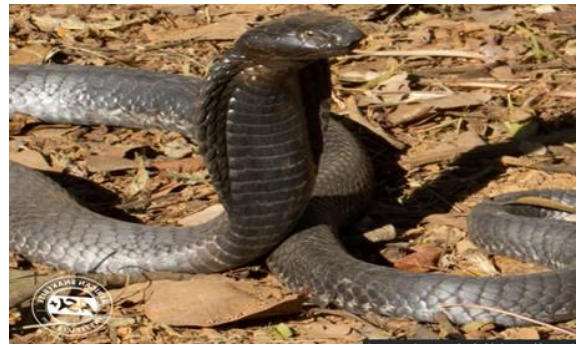

**8. Cobra cracheur à cou noir**

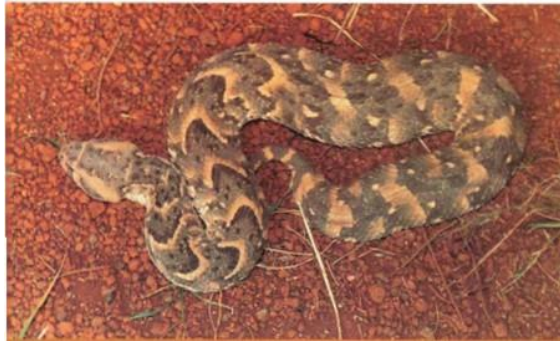

**9. Vipère heurtante**

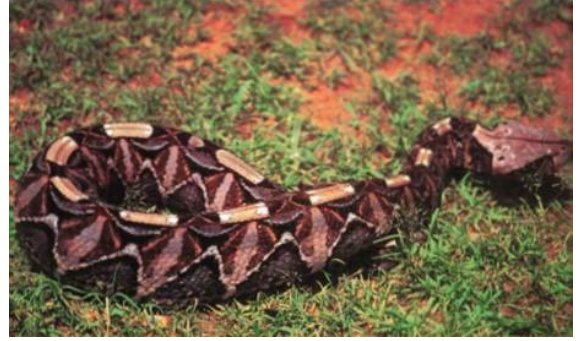

**10. Vipère du Gabon**

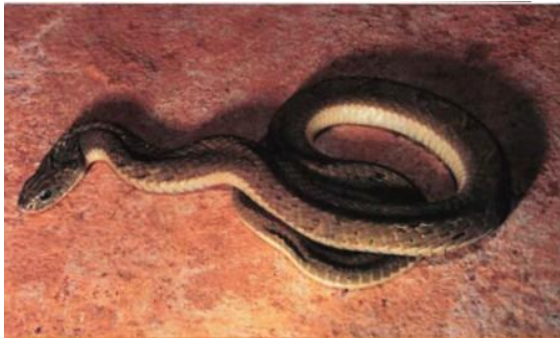

**11. Causus maculé**

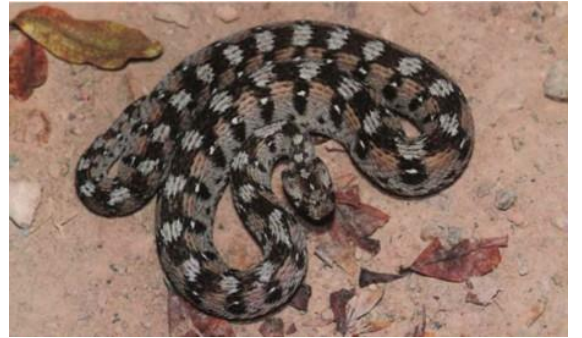

**12. Vipère à cornes de nez**



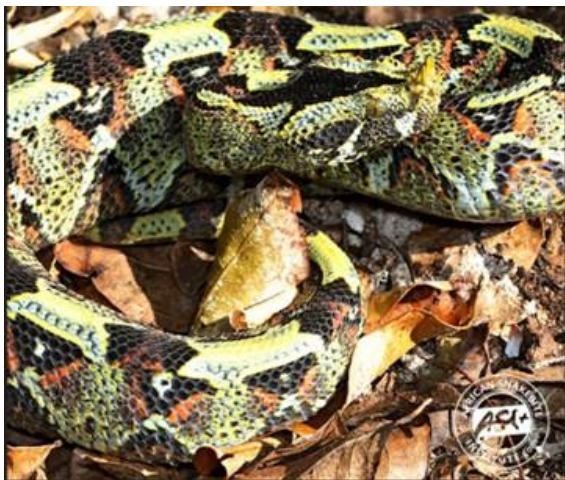

**13. Vipère rhinocéros**

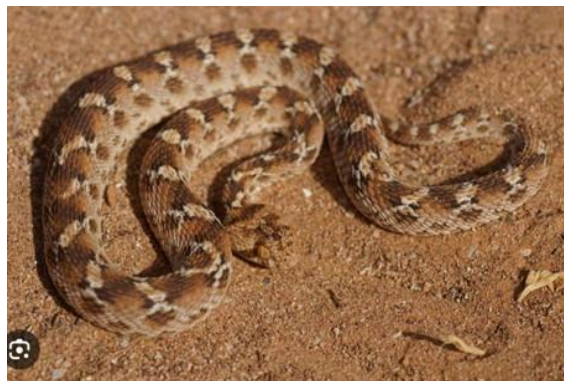

**14. Tapis ventre blanc Viper**

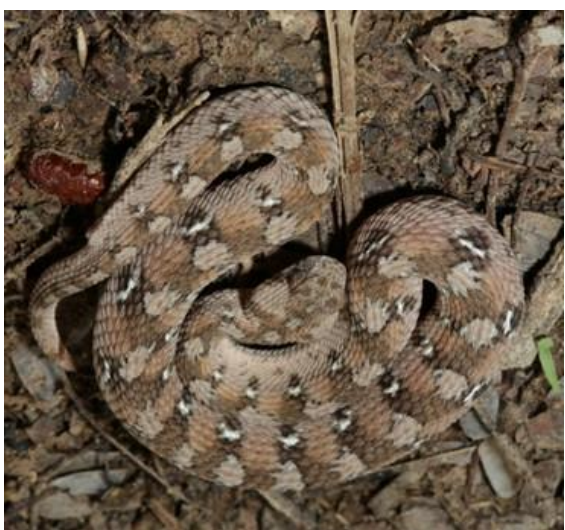

**15. Vipère à tapis d'Afrique de l'Ouest**

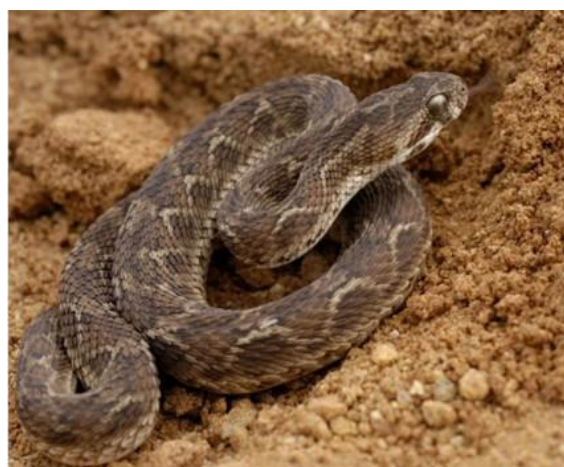

**16. Vipère à écailles de scie**

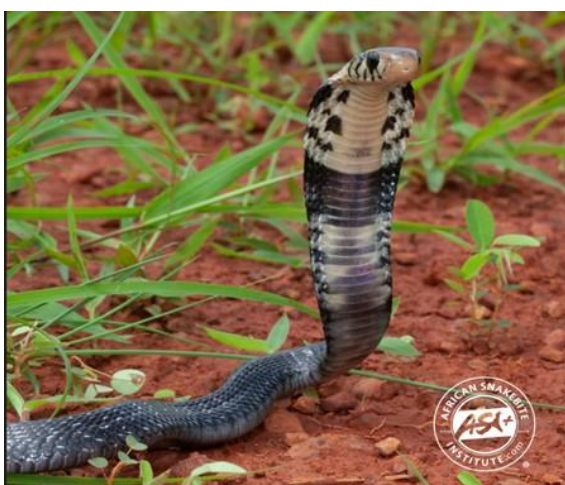

**17. Cobra des forêts**

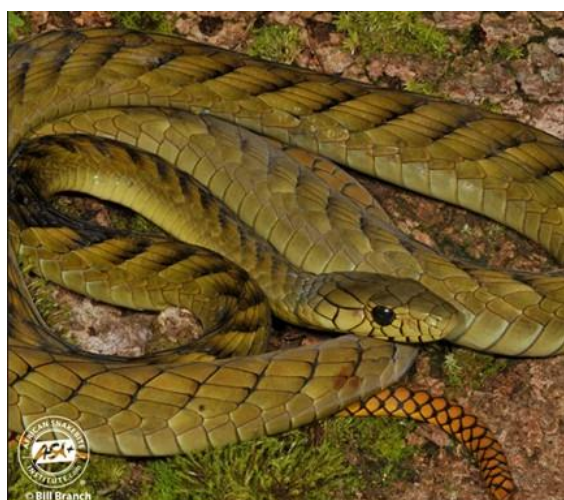

**18. Mamba vert occidental**



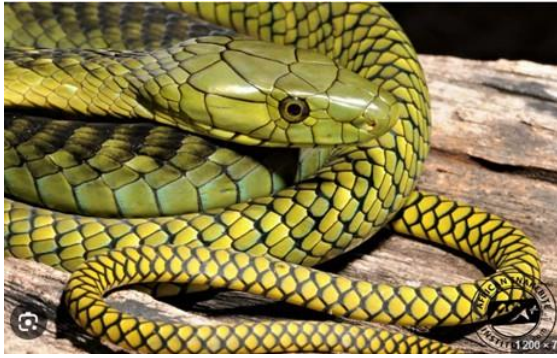

19. Mamba de Jameson

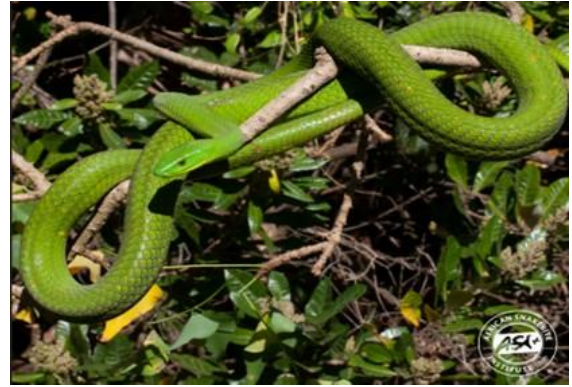

20. Mamba vert de l'Est

**PLANCHE SYNTHETIQUE AVEC LES IMAGES DE SERPENTS VENIMEUX DANS LES TYPES  
DE FORMATIONS SUIVANTES**

**SAVANES SOUDANIENNES, SAVANES SAHELIENNES ET MONTS MANDARA**

**Note: The above chart was used to identify the snake species responsible for the bite.**
